# Supplementary material
Source: publisher figshare collection journal article supplement (https://sage.figshare.com/ndownloader/files/12806927)
Supplement: Supplementary file 1 [file 12806927]

## Methods of Reactivity Ratio Evaluation

Several methods exist for evaluation of monomer reactivity ratios from experimental data [13-19].

Some of these methods utilized in the present work are:

### a) Fineman – Ross method [13]

Equation (2) can be rearranged as

$$\frac{M_1(m_2 - m_1)}{M_2 m_1} = \left[ \frac{-m_2 M_1^2}{m_1 M_2^2} \right] r_1 + r_2$$

A plot of  $\frac{M_1(m_2 - m_1)}{M_2 m_1}$  vs  $\left[ \frac{-m_2 M_1^2}{m_1 M_2^2} \right]$  gives a straight line whose slope is  $r_1$  and intercept  $r_2$ .

### b) Kelen – Tudos method [14]

Based on equation (1) an improved graphical method has been developed by Kelen – Tudos.

$$\eta = \left[ r_1 + \frac{r_2}{\alpha} \right] \xi - \frac{r_2}{\alpha}$$

where  $\eta = \frac{G}{\alpha + F}$  and  $\xi = \frac{F}{\alpha + F}$

$$F = \frac{x^2}{y} \text{ and } G = \frac{x(y-1)}{y}$$

$$x = \frac{M_1}{M_2} \text{ and } y = \frac{m_1}{m_2}$$

$M_1$  and  $M_2$  are the molar concentrations in the feed and  $m_1$  and  $m_2$  are the molar concentrations in the copolymer.

$$\alpha = \sqrt{F_M \cdot F_m}$$

$F_M$  = maximum mole ratio in copolymer

$F_m$  = minimum mole ratio in copolymer

Plot of  $\eta$  values versus  $\xi$  after extrapolation to  $\xi = 0$  and  $\xi = 1$ , gives  $-r_2/\alpha$  and  $r_1$  respectively, both as intercepts.
